# Supplementary material for: The dominating role of 2-mercaptobenzothiazole in silver nanocluster synthesis
Source: Research Square preprint supplement (doi:10.21203/rs.3.rs-6509819/v1), 2025-04-28
Supplement: Supplementary file 1 [file 9cd4ced2d1f55b9ed00fcfb7.docx]

**Supplementary material**

TITLE: **The dominating role of 2-mercaptobenzothiazole in silver nanocluster synthesis**

BedantaBoraha, Avishek Sarkarb, Sukesh Shillb, Abdul Wahaba and Apurba Kr. Barman*a

**Affiliations:**

a. Department of Chemistry, Cotton University, Panbazar, Guwhati-781001, Assam, India.

E-mail id of corresponding author: [apurba.barman@cottonuniversity.ac.in](mailto:apurba.barman@cottonuniversity.ac.in), ORCID id: 0009-0007-6896-2395

b. Department of Chemistry, Indian Institute of Technology Guwahati, North Guwahati-781039, Assam, India.

**Table of contents**

| **Title** | **Description** | **Page No.** |
| --- | --- | --- |
|  | Experimental Details | 1 |
| **Figure S1** | Quantum yield measurements of AgMBTNC-LE. | 2 |
| **Figure S2** | Lifetime measurements of AgMBTNC-LE. | 3 |
| **Figure S3** | PXRD of AgMBTNC-LE. | 3 |
| **Figure S4** | FTIR spectra of Ag-SGNC and AgMBTNC-LE. | 3 |
| **Figure S5** | Atomic percentages from XPS spectra of AgMBTNC-LE. | 4 |
| **Table T1** | Relative atomic percentages of C, S, N, O and Ag with respect to S in AgMBTNC-LE. | 4 |
| **Table T2** | TGA analysis of AgMBTNC-LE. | 5 |
| **Table T3** | Assignments of peaks for MALDI-TOF mass spectra of intermediate isolated form aqueous layer after 2 h of reaction. | 5 |
| **Figure S6** | Isotopic distributions of peaks for MALDI-TOF mass spectra of intermediate isolated form aqueous layer after 2 h of reaction. | 6 |
| **Table T4** | Assignments of peaks for MALDI-TOF mass spectra of intermediate isolated form organic layer after 2 h of reaction. | 6 |
| **Figure S7** | Isotopic distributions of peaks for MALDI-TOF mass spectra of intermediate isolated form organic layer after 2 h of reaction. | 6 |
| **Figure S8** | XPS spectrum of intermediate isolated form organic layer after 2 h of reaction. | 7 |

**Experimental section:**

**Instrumentation:**

UV-visible spectra were measured with a Shimadzu UV-2600 spectrophotometer in the range of 200-1400 cm-1. The emission spectra were recorded by using a Horiba FluoroMax-4 instrument. FTIR spectra were recorded in a Bruker APEXII spectrophotometer in the frequency range 4000-400 cm-1. PXRD measurements were performed on a Rigaku Ultima IV X-ray powder diffractometer. X-ray photoelectron Spectra (XPS) were obtained by an ESCALAB Xi+ (Thermo Fisher Scientific Pvt. Ltd., UK). The mass spectra were obtained by using a MALDI-TOF (Bruker, Model: Autoflex speed) mass spectrometer in a positive mode using sinapic acid as a matrix and ethanol as solvent. Thermogravimetric (TG) measurements were conducted on a Mettler Toledo instrument with a temperature range of 25-1000ºC and heating rate of 20ºC min-1.The FTIR spectrum of Ag-SGNC and AgMBTNC-LE was recorded in aBruker APEX Ⅱ spectrophotometer in the frequency range 500-4000 cm-1 (KBR phase). Time dependent UV-visibleabsorption spectrum of Ag-SGNC and AgMBTNC-LE was measured up throughShimadzu UV-2600 spectrophotometer (model no. UV-18000) from 1 hour to 8 hours. In these measurements thetwo nanoclustersi.e Ag-SGNC and AgMBTNC-LE are dissolved in water and ethanol respectively under sonication and in these measurements thespectrum is recorded from 200 nm to 1400 nm range in quartz cuvette having 1cm opticalpath length. Time dependent photoluminescence spectrum of all nanoclusterswas recorded in HoribaFluoroMax-4 instrument by exciting the nanoclusters from 260 to 450 nm range.Photoluminescence decay lifetime measurements were carried out on a time-correlated singlephoton counting (Edinburgh Instruments-Lifespec II) using a pulsed laser at 375 nm with anfwhm of ~153 ns. The MALDI-TOF mass spectrometry were conducted by using Bruker,Model: Autoflex speed mass spectrometer in appositive mode by using sinapic acid as amatrix at (at 1:100 ratio of sample to matrix). For MALDI MS studies a pulsed nitrogen laserof 337 nm was used for mass analysis of Ag-SGNC, AgMBTNC-LE and all the intermediates. The X-ray photoelectron spectroscopy (XPS) was used to evaluate thechemical composition of nanoclustersAgMBTNC-I (after 4 hours) and AgMBTNC-LE by using a Thermo-Scientific ESCALAB Xi+ (UK)with a monochromatic Al Kα X-ray source (1486.6 eV). RigakuUltimaⅣ X-ray powderdiffractometer was used for PXRD measurements of all the nanoclusters (Ag-SGNC and AgMBTNC-LE) with a Cu Kα X-raysource, equipped with a Ni filter to suppress Kβ emission and a D/teXUltra high-speedposition sensitive detector, and measurements were performed at room temperature, with ascan rate of 10º min-1, scan range 2𝜃= 5-50º, and step size of 0.02º.Thermogravimetric (TG)measurements of two nanoclusters (AgMBTNC-I and AgMBTNC-LE) were performed on a Mettler Toledo instrument with atemperature range of 25-700 ºC and a heating rate of 20 ºC min-1. Nanoclusters were placedin silica crucibles and purged by a steam of nitrogen flowing at 80 mL.


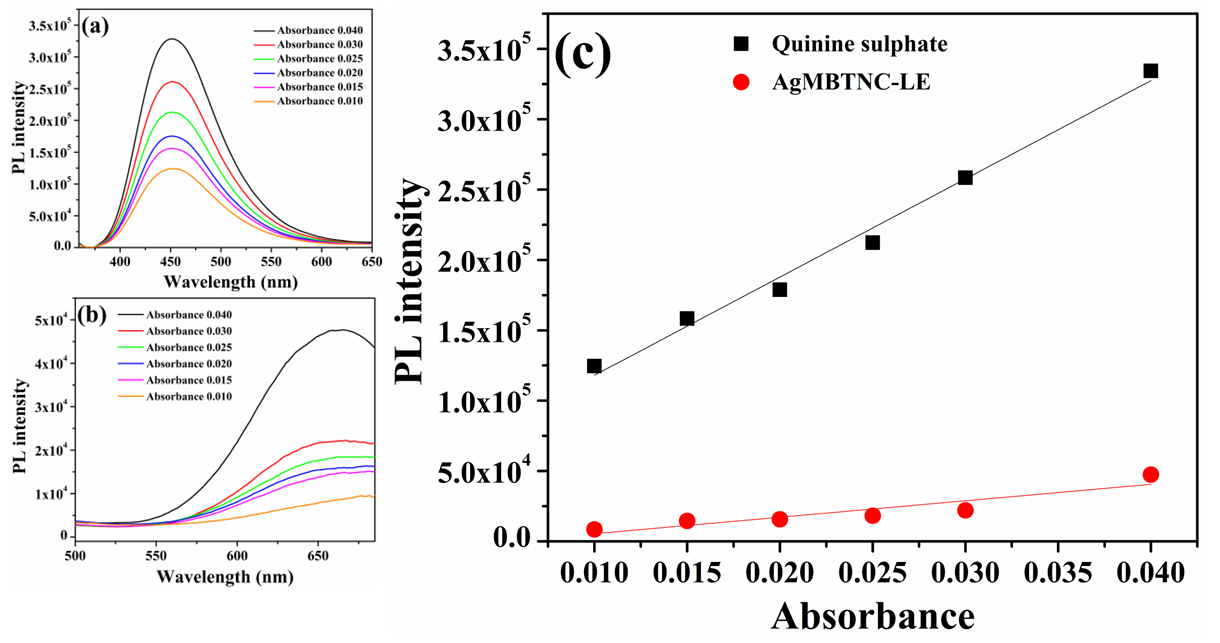


**Figure S1:** Photoluminescence spectra for (a) Quinine sulphate (QY reference) (b) AgMBTNC-LE at the same excitation wavelength and keeping the same absorbance at the excitation wavelength. (c) Plot of maximum emission intensity vs. absorbance used for QY calculations.

**Quantum yield (QY) calculation:**

The QY of AgMBTNC-LE was determined from the slope of plot (Absorbance vs. maximum emission intensity). In this method quinine sulphate (in 0.1 M H2SO4) was taken as standard with a known QY of 54%. AgMBTNC-LE was dissolved in ethanol. The following equation is used for QY measurement.2

Where K is the slope determined from the graph, and η is the refractive index of the solvent (refractive index of ethanol is 1.36). The same excitation wavelength (366 nm) and band width were applied to the AgMBTNC-LE and standard.

| Slope of  AgMBTNC-LE | Slope (standard) |  | QYstd | QYAgMBTNC-LE |
| --- | --- | --- | --- | --- |
| 1.10x106 | 6.90x106 | 1.85 | 54% | 15.92% |


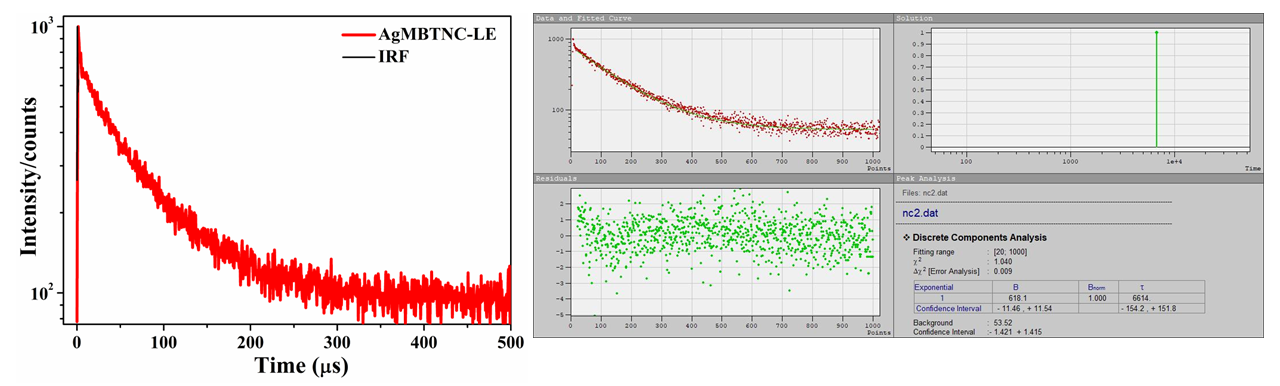


**Figure S2:** Fluorescence life time decay of AgMBTNC-LE.


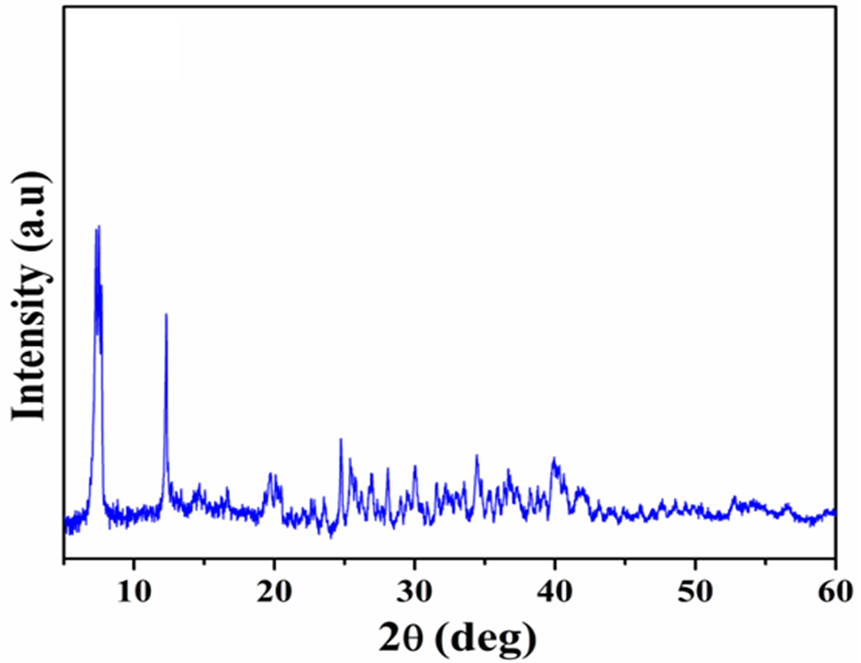


**Figure S3:** PXRD of AgMBTNC-LE.


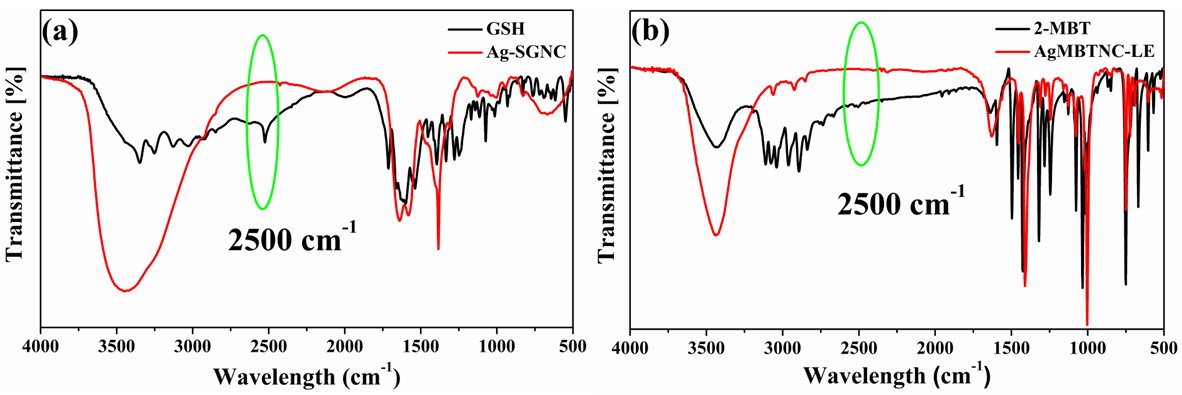


**Figure S4:** FTIR spectra of (a) Ag-SGNC and (b) AgMBTNC-LE.


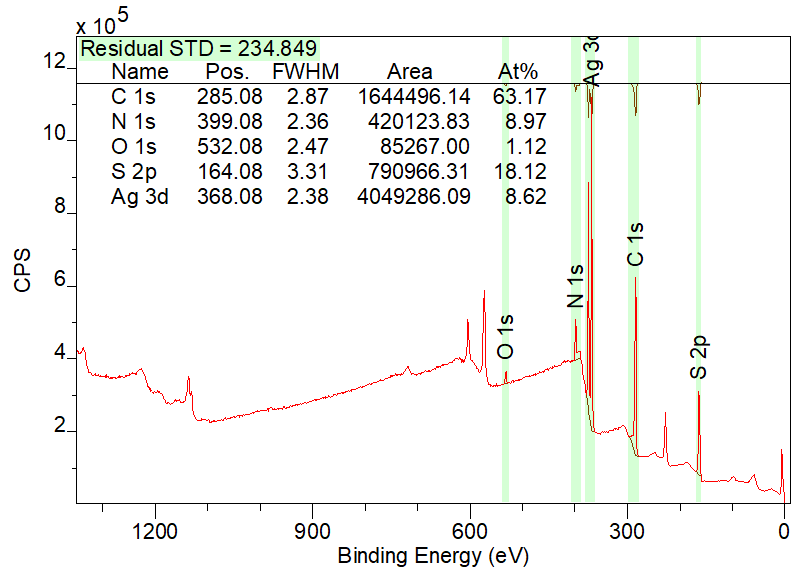


**Figure S5:** Atomic percentages from XPS spectra of AgMBTNC-LE obtained using CASA software.

**Table T1:** Relative atomic percentages of C, S, N, O and Ag with respect to S in AgMBTNC-LE.

| NAME OF THE ELEMENTS | ATOMIC PERCENTAGE (%) from XPS data | RATIO | |
| --- | --- | --- | --- |
| EXPERIMENTAL | THEORITICAL |
| CARBON (C) | ~63.17 | C/S=3.48 | 89 C/24 S=3.70 |
| SULPHUR (S) | ~18.12 | S/S=1 | 24 S/24 S=1 |
| NITROGEN (N) | ~8.97 | N/S=0.49 | 12 N/24 S=0.50 |
| OXYGEN (O) | ~1.12 | O/S=0.06 | 4 O/24 S=0.16 |
| SILVER (Ag) | ~8.62 | Ag/S=0.47 | 16 Ag/24 S=0.66 |

**Table T2:** TGA analysis of AgMBTNC-LE

| Name | Molecular weight | Experimental percentage | Theoretical percentage |
| --- | --- | --- | --- |
| AgMBTNC-LE (C89H66Ag16N12O4S24) | 3863.0 |  |  |
| Solvent (C5H18O4) | 142.2 | 3.6% | 3.7% |
| Ligand (C84H48N12S24) | 1994.9 | 52.2% | 51.6% |
| Silver residue (Ag16) | 1725.8 | 44.2% | 44.7% |

**Table T3**: Assignments of peaks for MALDI-TOF mass spectra of intermediate isolated form aqueous layer after 2 h of reaction.

| Formula | Experimental m/z value | Theoretical m/z value |
| --- | --- | --- |
| [Ag4]2+ | 215.56 | 215.81 |
| [Ag4S2]2+ | 247.78 | 247.65 |
| [Ag3(SG)1(S)1]+ | 660.32 | 660.76 |
| [Ag3(2-MBT)2 + H2O]+ | 692.95 | 692.69 |
| [Ag4(SG)1(2-MBT)1]+ | 903.66 | 903.67 |
| [Ag3(SG)2]+ | 934.66 | 934.87 |
| [Ag3(SG)2(2-MBT)1+ 3H2O + H]+ | 1157.85 | 1157.88 |
| [Ag5(SG)2(S)1]+ | 1182.46 | 1182.65 |
| [Ag5(SG)2(2-MBT)1(S)1+ 3H2O + H]+ | 1403.55 | 1403.67 |
| [Ag4(SG)2(2-MBT)2+ 3H2O + H]+ | 1430.45 | 1430.77 |


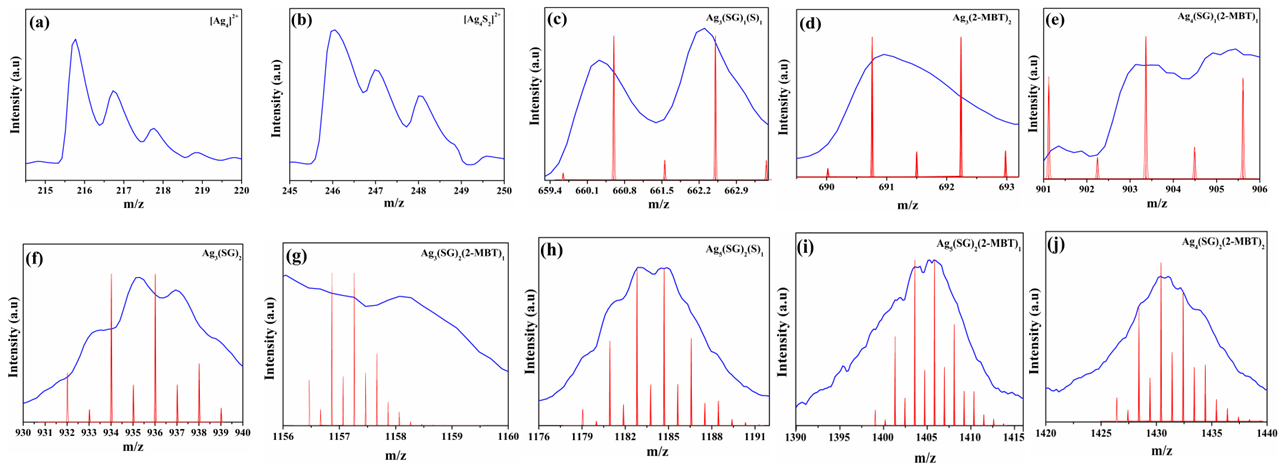


**Figure S6**: Isotopic distributions of peaks for MALDI-TOF mass spectra of intermediate isolated form aqueous layer after 2 h of reaction. Ag-SGNC (a) [Ag4]2+, (b) [Ag4S2]2+, (c) Ag3(SG)1(S)1, (d) Ag3(2-MBT)2, (e) Ag4(SG)1(2-MBT)1, (f) Ag3(SG)2, (g) Ag3(SG)2(2-MBT)1, (h) Ag5(SG)2(S)1, (i) Ag5(SG)2(2-MBT)1(S)1 and (j) Ag4(SG)2(2-MBT)2. Colour code: Experimental (blue) and theoretical (red).

**Table T4**: Assignments of peaks for MALDI-TOF mass spectra of intermediate isolated form organic layer after 2 h of reaction.

| Formula | Experimental m/z value | Theoretical m/z value |
| --- | --- | --- |
| [Ag2(2-MBT)1 + CH3OH + 2H+]+ | 447.74 | 447.80 |
| [Ag5(2-MBT)2(S)1 + 2 H2O + 4 H+]2+ | 471.25 | 471.25 |
| [Ag3(2-MBT)2(S)1 + CH3OH + 3H+]+ | 723.50 | 723.69 |


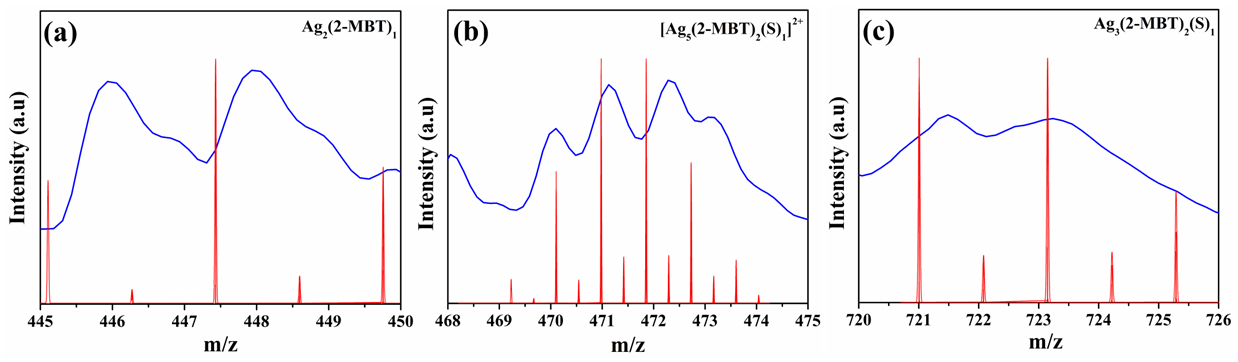


**Figure S7**: Isotopic distributions of peaks for MALDI-TOF mass spectra of intermediate isolated form organic layer after 2 h of reaction. (a) Ag2(2-MBT)1, (b) [Ag5(2-MBT)2(S)1]2+ and (c) Ag3(2-MBT)2(S)1. Colour code: Experimental (blue) and theoretical (red).


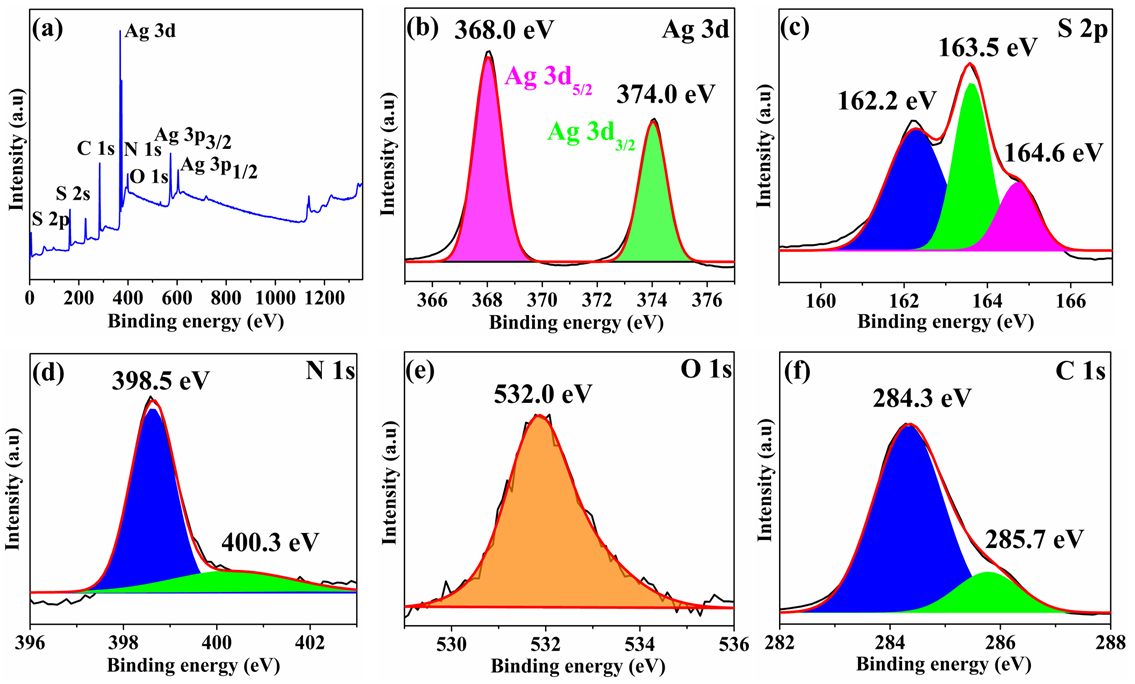


**Figure S8:** (a) Full scan XPS survey spectrum of intermediate isolated form organic layer after 2 h of reaction. High resolution XPS spectra of (b) Ag 3d (c) S 2p (d) N 1s (e) O 1s and (f) C 1s.
